# Supplementary material
Source: Springer Nature journal article supplement (http://www.springermedizin.de/resource/supplementary/12990_2010_286_MOESM2_ESM.pdf/9612956)

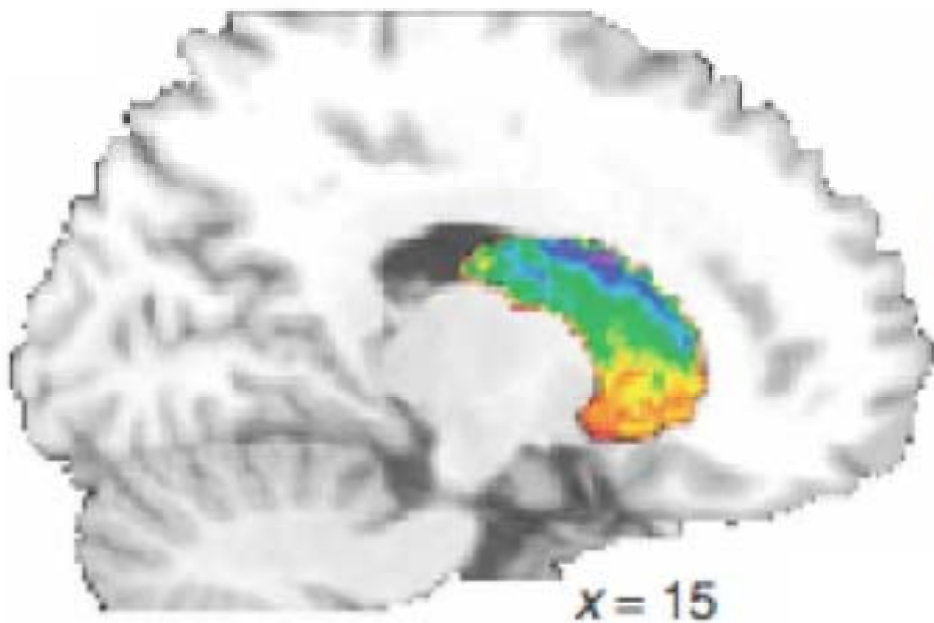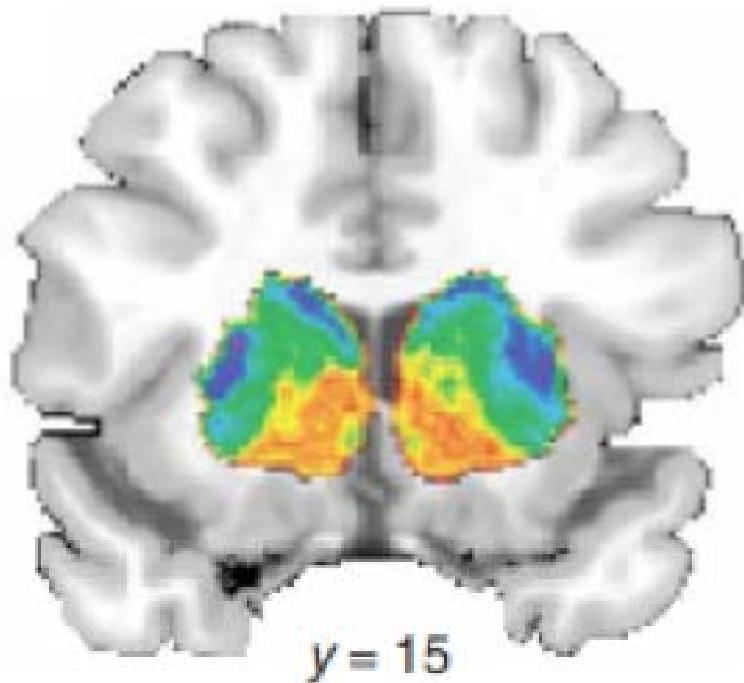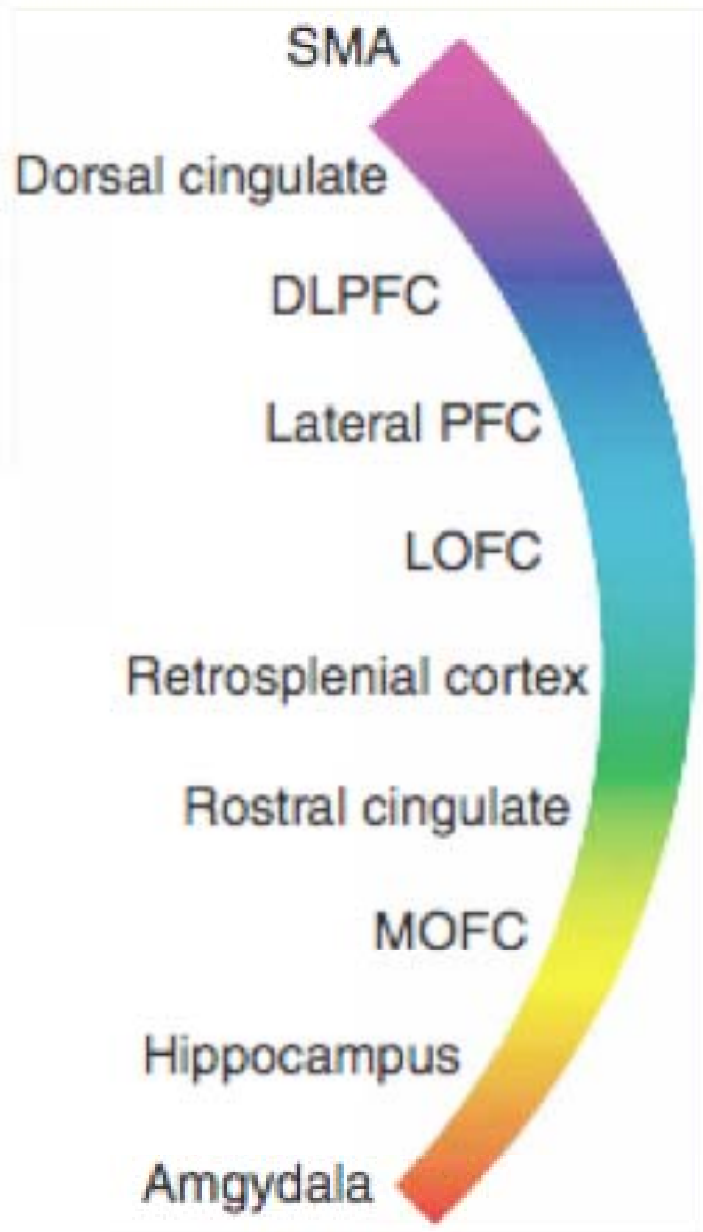

Supplement: MOESM2 [file 9612956]
